# Supplementary material for: Single and Repeated Applications of Cerium Oxide Nanoparticles Differently Affect the Growth and Biomass Accumulation of Silene flos-cuculi L. (Caryophyllaceae)
Source: MDPI journal article supplement (doi:10.3390/nano11010229), 2021-01-16
Supplement: s1 [file s1]

# Single and Repeated Applications of Cerium Oxide Nanoparticles Differently Affect the Growth and Biomass Accumulation of *Silene flos-cuculi* L. (*Caryophyllaceae*)

Daniel Lizzi <sup>1,2</sup>, Alessandro Mattiello <sup>2</sup>, Barbara Piani <sup>1</sup>, Emanuele Gava <sup>3</sup>, Guido Fellet <sup>1</sup> and Luca Marchiol <sup>1,\*</sup>

<sup>1</sup> Department of AgriFood, Environmental and Animal Science, University of Udine, via delle Scienze 206, 33100 Udine, Italy; lizzi.daniel.1@spes.uniud.it (D.L.); alessandro.mattiello@uniud.it; barbara.piani@uniud.it (B.P.); guido.fellet@uniud.it (G.F.)

<sup>2</sup> Department of Life Sciences, University of Trieste, Via Licio Giorgieri 10, 34127, Trieste, Italy;

<sup>3</sup> Laboratory of Inorganic Micro-Pollutants Regional Environmental Protection Agency of Friuli Venezia Giulia (ARPA-FVG), Via Colugna 42, 33100 Udine, Italy; emanuele.gava@arpa.fvg.it

\* Correspondence: marchiol@uniud.it

## Results

### Nanoparticles characterization

**Table S1.** Average, PDI and  $\zeta$  - potentials of nCeO<sub>2</sub> 25 nm.

| Material                | Z - average (nm) | PDI         | $\zeta$ - potential (mV) |
|-------------------------|------------------|-------------|--------------------------|
| nCeO <sub>2</sub> 25 nm | 126.7 ± 1.0      | 0.17 ± 0.01 | 39.2 ± 1.1               |

### nCeO<sub>2</sub> in plant fractions

**Table S2.** Most frequent particle size, mean particle size, number of pulses and concentration of dissolved Ce determined by sp-ICP-MS analysis after enzymatic extraction from roots and leaves of *Silene flos-cuculi*.

| Plant fraction | Replicate | nCeO <sub>2</sub> most frequent size (nm) | nCeO <sub>2</sub> mean size (nm) | Pulses (n) | Dissolved Ce (µg kg <sup>-1</sup> ) |
|----------------|-----------|-------------------------------------------|----------------------------------|------------|-------------------------------------|
| Roots          | 1         | 31                                        | 35                               | 3279       | 5.32                                |
| Roots          | 2         | 27                                        | 31                               | 2136       | 4.58                                |
| Roots          | 3         | 30                                        | 33                               | 2091       | 4.69                                |
| Mean±SD        |           | 29 ± 2.08 <sup>†</sup>                    | 33 ± 2                           | 2502 ± 673 | 4.86 ± 0.40                         |
| Leaves         | 1         | 25                                        | 31                               | 630        | 0.05                                |
| Leaves         | 2         | 26                                        | 29                               | 653        | 0.08                                |
| Leaves         | 3         | 28                                        | 32                               | 583        | 0.10                                |
| Mean±SD        |           | 26 ± 1.53                                 | 31 ± 1.53                        | 622 ± 35.7 | 0.08 ± 0.03                         |

<sup>†</sup> Standard Deviation

## Plant growth

**Table S3.** Two-way ANOVA p values testing the statistically significant effects of dose and concentration and their interaction of *nCeO<sub>2</sub>* on biometric variables of *Silene flos-cuculi*. ns: not significant at  $p \leq 0.05$ ; \*  $p \leq 0.05$ , \*\*\*  $p \leq 0.001$ .

| Variable         | Dose       | Concentration | Dose x Concentration |
|------------------|------------|---------------|----------------------|
| Roots DW         | 0.0009 *** | 0.0281 *      | 0.0179 *             |
| Stems per plant  | 0.0942 ns  | 0.4020 ns     | 0.5681 ns            |
| Stems DW         | 0.8874 ns  | 0.0000 ***    | 0.9956 ns            |
| Leaves per plant | 0.2645 ns  | 0.7375 ns     | 0.7963 ns            |
| Leaf area        | 0.7498 ns  | 0.7028 ns     | 0.8419 ns            |
| Leaves DW        | 0.8990 ns  | 0.6052 ns     | 0.9704 ns            |
| Total DW         | 0.8436 ns  | 0.0000 ***    | 0.9885 ns            |

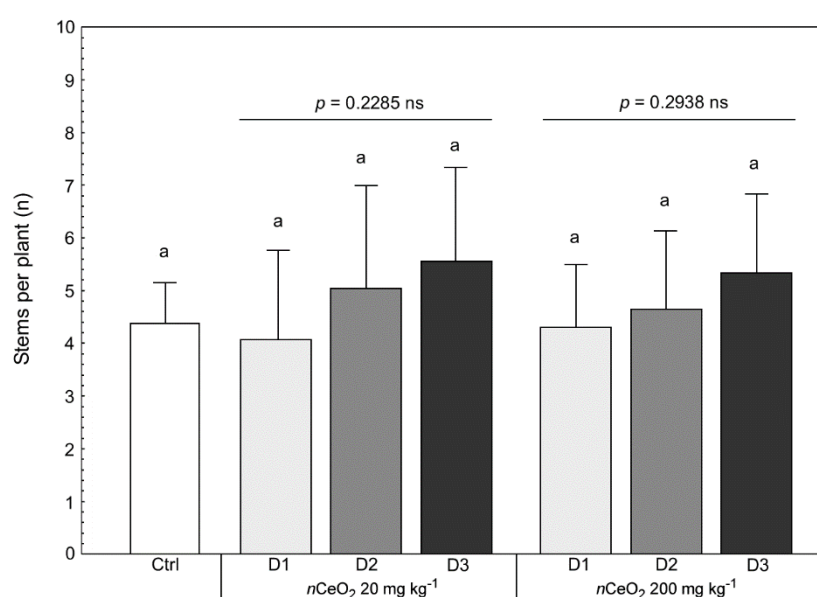

**Figure S1.** Number of stems per plant in specimens of *S. flos cuculi*. Comparison of effects based on single (D1) and repeated applications (D2, D3) of respectively 20 and 200 mg kg<sup>-1</sup> *nCeO<sub>2</sub>*. Letters indicate statistically significant difference between treatments ( $p \leq 0.05$ ) using one-way ANOVA followed by Tukey's test. †One-way ANOVA p value within each concentration.

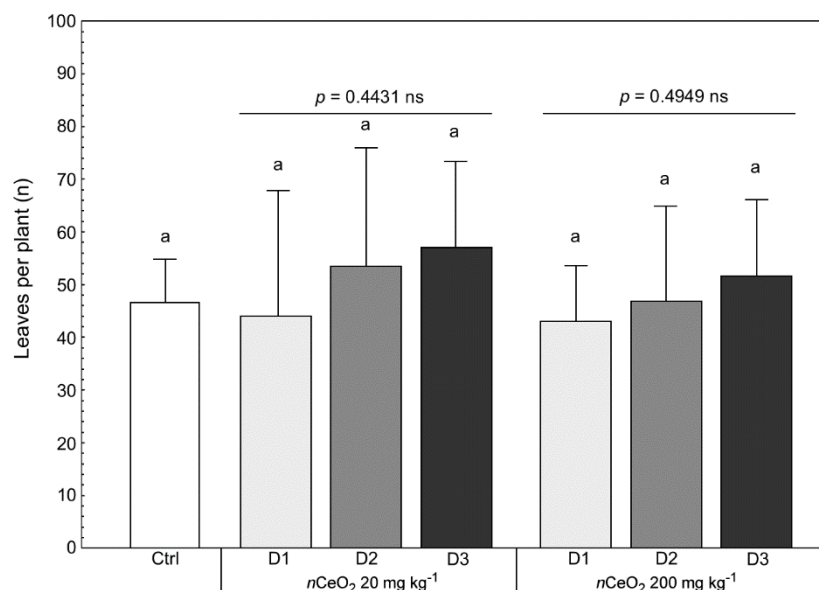

**Figure S2.** Number of leaves per plant in specimens of *S. flos cuculi*. Comparison of effects based on single (D1) and repeated applications (D2, D3) of respectively 20 and 200 mg kg<sup>-1</sup> nCeO<sub>2</sub>. Letters indicate statistically significant difference between treatments ( $p \leq 0.05$ ) using one-way ANOVA followed by Tukey's test. \*One-way ANOVA p value within each concentration.

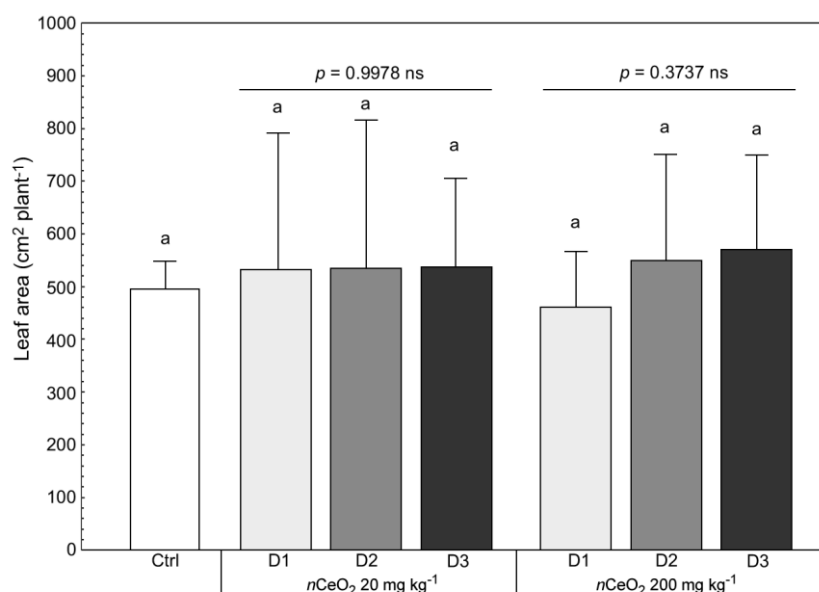

**Figure S3.** Total leaf area in plants of *S. flos cuculi*. Comparison of effects based on single (D1) and repeated applications (D2, D3) of respectively 20 and 200 mg kg<sup>-1</sup> nCeO<sub>2</sub>. Letters indicate statistically significant difference between treatments ( $p \leq 0.05$ ) using one-way ANOVA followed by Tukey's test. \*One-way ANOVA p value within each concentration.

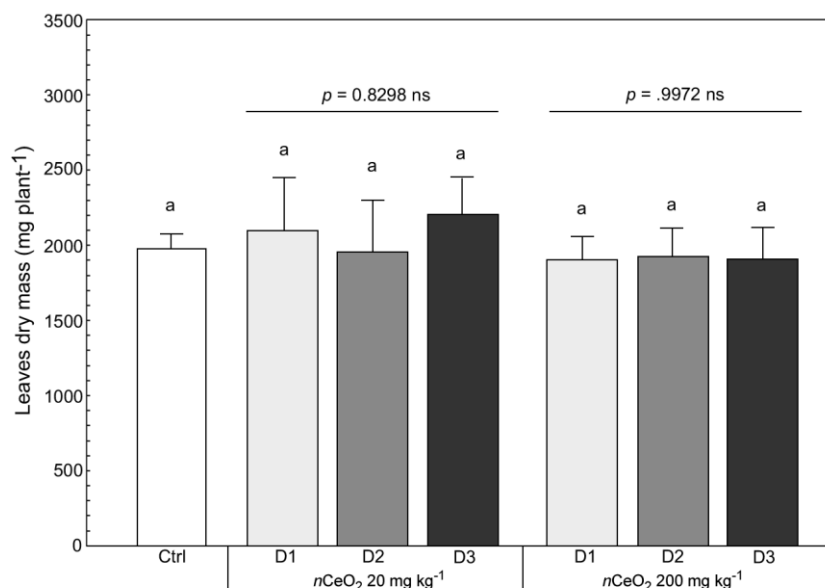

**Figure S4.** Leaves dry matter in plants of *S. flos cuculi*. Comparison of effects based on single (D1) and repeated applications (D2, D3) of respectively 20 and 200 mg kg<sup>-1</sup> nCeO<sub>2</sub>. Letters indicate statistically significant difference between treatments ( $p \leq 0.05$ ) using one-way ANOVA followed by Tukey's test. <sup>†</sup>One-way ANOVA p value within each concentration.

**Table S4.** Biomass allocation variables calculated from plant measurements (Poorter et al, 2011).

| Variable            | Abbreviation | Definition                           | Unit                            |
|---------------------|--------------|--------------------------------------|---------------------------------|
| Root Mass Fraction  | RMF          | Root dry mass/Total plant dry mass   | g g <sup>-1</sup>               |
| Stem Mass Fraction  | SMF          | Stem dry mass/Total plant dry mass   | g g <sup>-1</sup>               |
| Leaf Mass Fraction  | LMF          | Leaf dry mass/Total plant dry mass   | g g <sup>-1</sup>               |
| Shoot to Root ratio | S/R ratio    | (Leaf + Stem dry mass)/Root dry mass | g g <sup>-1</sup>               |
| Leaf Area Ratio     | LAR          | Leaf area/Total plant dry mass       | m <sup>2</sup> kg <sup>-1</sup> |
| Specific Leaf Area  | SLA          | Leaf area/Leaf dry mass              | m <sup>2</sup> kg <sup>-1</sup> |

**Table S5.** Two-way ANOVA p values testing the statistically significant effects of dose and concentration and their interaction of nCeO<sub>2</sub> on growth indices of *Silene flos-cuculi* ns: not significant at  $p \leq 0.05$ ; \*  $p \leq 0.05$ , \*\*  $p \leq 0.01$  and \*\*\*  $p \leq 0.001$ .

| Variable  | Dose       | Concentration | Dose x Concentration |
|-----------|------------|---------------|----------------------|
| RMF       | 0.0001 *** | 0.0001 ***    | 0.0201 *             |
| SMF       | 0.3103 ns  | 0.0000 ***    | 0.8223 ns            |
| LMF       | 0.7438 ns  | 0.0000 ***    | 0.9545 ns            |
| S/R ratio | 0.0011 **  | 0.0000 ***    | 0.0593 ns            |
| LAR       | 0.7703 ns  | 0.0000 ***    | 0.3778 ns            |
| SLA       | 0.1438 ns  | 0.0958 ns     | 0.0251 *             |

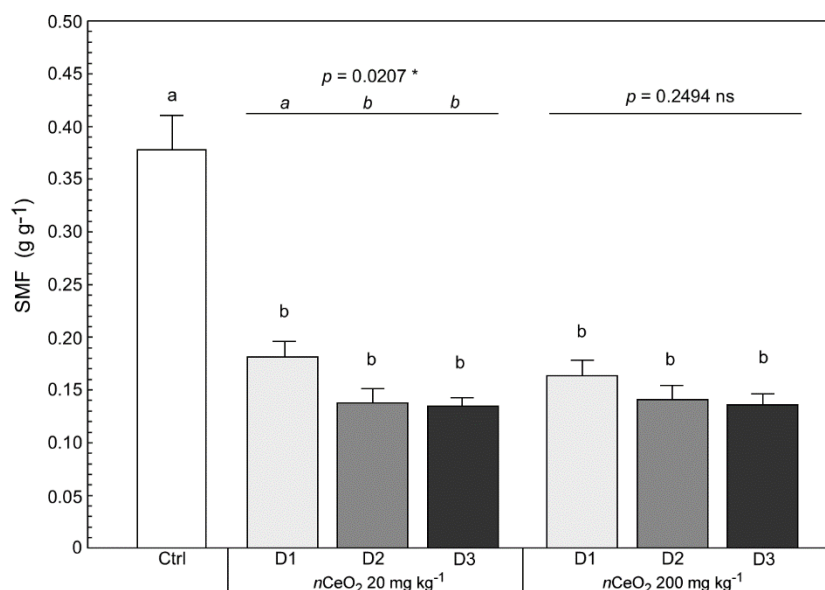

**Figure S5.** Stem mass fraction of *S. flos cuculi*. Comparison of effects based on single (D1) and repeated applications (D2, D3) of respectively 20 and 200 mg kg<sup>-1</sup> nCeO<sub>2</sub>. Letters indicate statistically significant difference between treatments ( $p \leq 0.05$ ) using one-way ANOVA followed by Tukey's test. \*One-way ANOVA p value within each concentration.

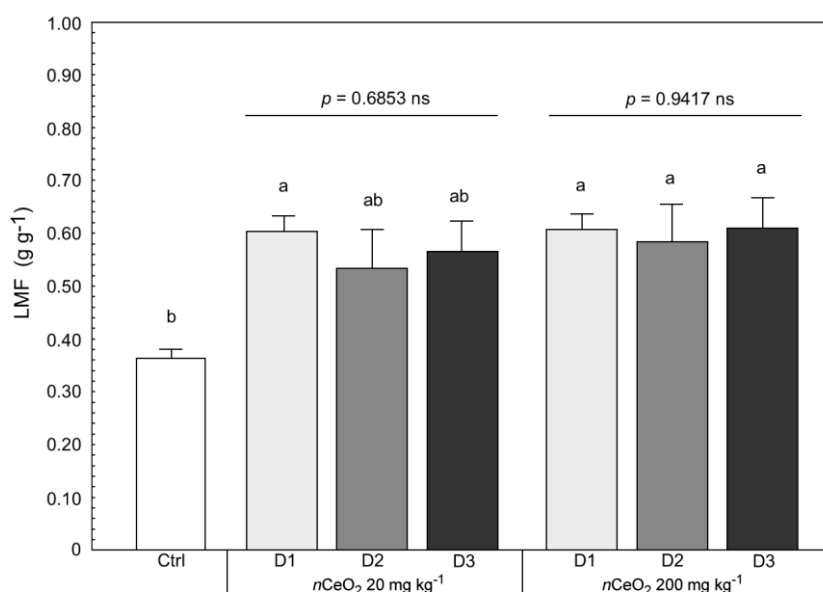

**Figure S6.** Leaf mass fraction of *S. flos cuculi*. Comparison of effects based on single (D1) and repeated applications (D2, D3) of respectively 20 and 200 mg kg<sup>-1</sup> nCeO<sub>2</sub>. Letters indicate statistically significant difference between treatments ( $p \leq 0.05$ ) using one-way ANOVA followed by Tukey's test. \*One-way ANOVA p value within each concentration.

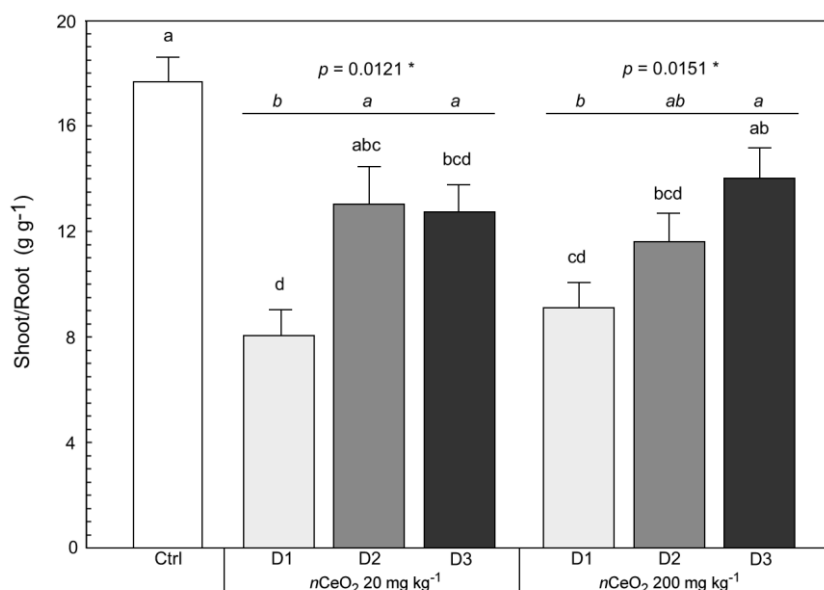

**Figure S7.** Shoot to root ratio in *S. flos cuculi*. Comparison of effects based on single (D1) and repeated applications (D2, D3) of respectively 20 and 200 mg kg<sup>-1</sup> nCeO<sub>2</sub>. Letters indicate statistically significant difference between treatments ( $p \leq 0.05$ ) using one-way ANOVA followed by Tukey's test. \*One-way ANOVA p value within each concentration.

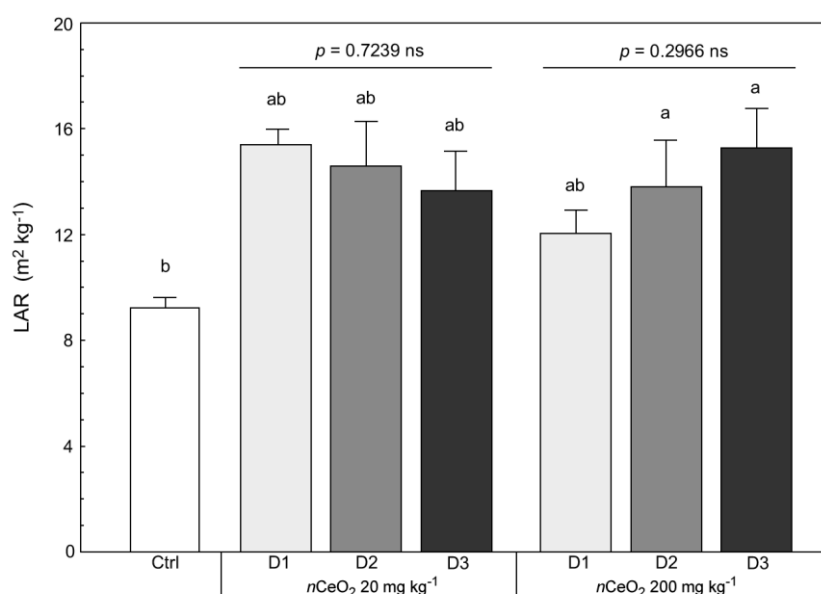

**Figure S8.** Leaf area ratio of *S. flos cuculi*. Comparison of effects based on single (D1) and repeated applications (D2, D3) of respectively 20 and 200 mg kg<sup>-1</sup> nCeO<sub>2</sub>. Letters indicate statistically significant difference between treatments ( $p \leq 0.05$ ) using one-way ANOVA followed by Tukey's test. \*One-way ANOVA p value within each concentration.

*Ce accumulation plant fractions*

**Table S6.** Two-way ANOVA p values testing the statistically significant effects of dose and concentration and their interaction on Ce concentration in fractions of *S. flos-cuculi* and Ce translocation factor. ns: not significant at  $p \leq 0.05$ ; \*  $p \leq 0.05$ , \*\*  $p \leq 0.01$  and \*\*\*  $p \leq 0.001$ .

| Variable                  | Dose       | Concentration | Dose x Concentration |
|---------------------------|------------|---------------|----------------------|
| Ce roots                  | 0.0811 ns  | 0.0000 ***    | 0.0313 *             |
| Ce stems                  | 0.0000 *** | 0.0000 ***    | 0.0021 **            |
| Ce leaves                 | 0.8188 ns  | 0.0005 ***    | 0.0786 ns            |
| TF <sub>root-leaves</sub> | 0.0395 *   | 0.3402 ns     | 0.3775 ns            |
